# Supplementary material for: Firefly luciferin methyl ester illuminates the activity of multiple serine hydrolases
Source: Royal Society of Chemistry journal article supplement (doi:10.1039/d3cc02540c), 2023-01-01

**Supporting Information for:**

## **Luciferin methyl ester illuminates the activity of multiple serine hydrolases**

Innus Mohammad, Kate L. Liebmann, and Stephen C. Miller\*

Department of Biochemistry and Molecular Biotechnology, University of Massachusetts Chan  
Medical School, Worcester, MA, USA

Correspondence should be addressed to S.C.M. ([stephen.miller@umassmed.edu](mailto:stephen.miller@umassmed.edu))

### Table of Contents:

|                                 |         |
|---------------------------------|---------|
| Supplementary Figures S1-3      | S2 – S4 |
| General Experimental Procedures | S5 – S6 |
| Serine Hydrolase sequences      | S7 – S9 |
| Synthetic Procedures            | S10     |
| References                      | S11     |
| NMR                             | S12     |

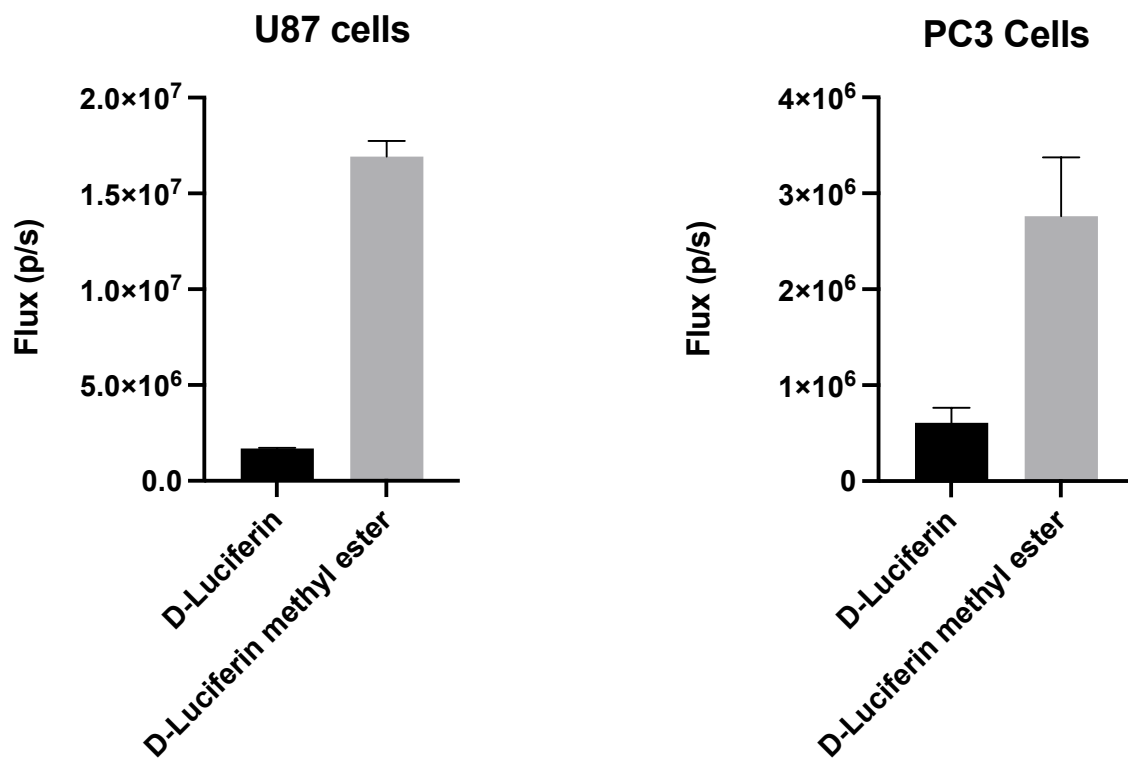

Figure S1. Comparison of bioluminescence from 10  $\mu$ M D-luciferin and 10  $\mu$ M D-luciferin methyl ester in luciferase-expressing U87 and PC3 cells.

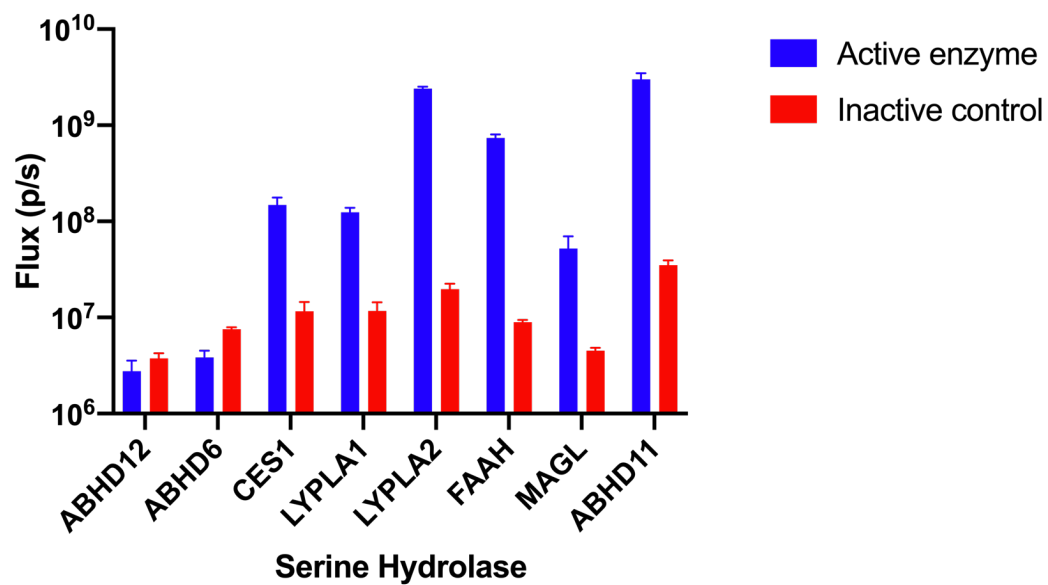

**Figure S2.** Effect of serine hydrolase expression on bioluminescence with 10  $\mu$ M D-luciferin methyl ester in luciferase-expressing HEK293 cells. The active serine hydrolase is compared to its control inactive serine-to-alanine mutant. The ratio is reported in Figure 3.

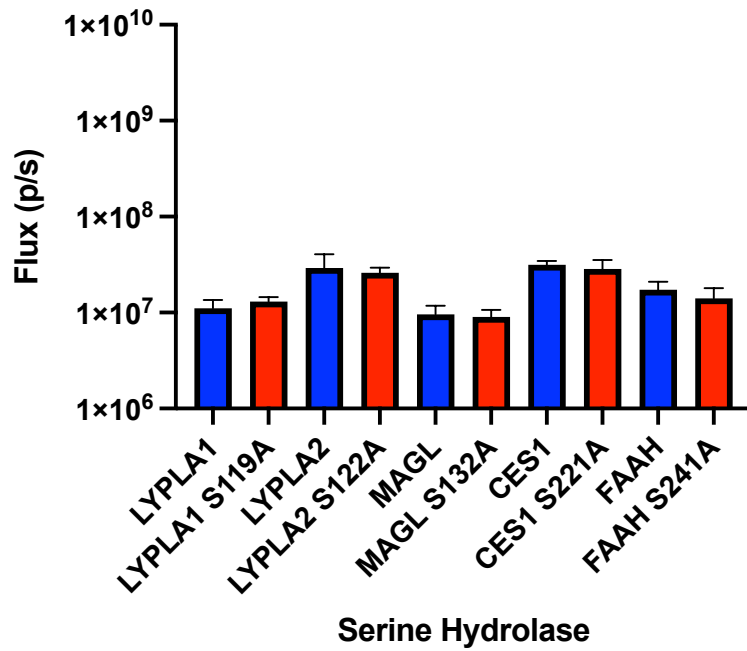

Figure S3. Effect of active vs inactive serine hydrolase expression on bioluminescence with 10  $\mu$ M D-luciferin in luciferase-expressing HEK293 cells.

## **Experimental Procedures**

### **Materials and Methods**

#### **General**

Chemicals for synthesis were obtained from AstaTech, ChemImpex, or Sigma-Aldrich unless otherwise noted. D-luciferin was obtained from Gold Bio. Serine hydrolase inhibitors were purchased from Cayman. Cell lines were purchased from ATCC. Serine hydrolases cloned into pcDNA3.1 vectors were purchased from GenScript. Protein concentrations were determined using Coomassie Plus (Thermo Scientific). Bioluminescence assays were performed on a Xenogen IVIS-100 in the Small Animal Imaging facility. Data acquisition and analysis were performed with Living Image® software. Data were plotted and analyzed with GraphPad Prism 6.0. Data are reported as total flux (p/s) for each region of interest (ROI). For *in vitro* and cellular assays, the ROIs correspond to each well of a 96-well plate. NMR spectra were acquired on a Bruker Avance III HD 500 MHz NMR. High resolution mass spectral data were recorded on a Waters QTOF Premier spectrometer (University of Massachusetts Medical School Proteomics and Mass Spectrometry Facility).

#### **Cell Culture**

PC3, U87, and HEK293 cells were grown in a CO<sub>2</sub> incubator at 37°C with 5% CO<sub>2</sub> and were cultured in F-12K Nutrient Mixture (GIBCO) and Dulbecco's Modified Eagle's Medium (DMEM) (GIBCO) respectively. Both media were supplemented with 10% fetal bovine serum and 100 U/mL penicillin/streptomycin.

#### **Transfections**

Cells were transfected with codon-optimized firefly luciferase (*luc2*) as previously described.<sup>1</sup> Transient transfections were performed at RT using Lipofectamine 2000 on cells plated at 60%–80% confluency in 96-well black tissue culture-treated plates (Costar 3916). For PC3 and U87

cells, 0.075 µg DNA/well of pcDNA3.1-luc2 was transfected; for HEK293 cells, 0.0375 µg DNA/well each of pcDNA3.1-luc2 and either pcDNA3.1-serine hydrolase or control pcDNA3.1 serine hydrolase S>A mutant was transfected. Assays were performed in triplicate 48 hrs after transfection.

### **Live Cell Serine Hydrolase Activity Assays**

Transfected cells were washed with HBSS. For inhibitor assays, the cells in 96-well plates were incubated with 50 µL of the indicated concentration of serine hydrolase inhibitor in HBSS at ambient temperature for 30 minutes. Then, 50 µL of 20 µM luciferin or luciferin ester substrate was added to each well to a final luciferin or luciferin ester concentration of 10 µM.

Bioluminescence imaging was performed one minute after the addition of substrate.

**Serine hydrolases used in this study.** For each serine hydrolase, the indicated inactive serine-to-alanine mutant was expressed as a control:

**MAGL (NP\_009214.1)**

```

1 metgpedpss mpeessprrt pqsipyqdlp hlvnadgqyl fcrywkptgt pkalifvshg
61 agehsgryee larmlmgldl lvfahdhvgh gqsegermvv sdfhvfvrdrv lqhvdsmqkd
121 ypglpvfllg hsmggaiail taaerpghfa gmvlisplvl anpesattfk vlaakvlnlv
181 lpnlslgpid ssvlsrnkte vdiynsdpli craglkvcfg iqllnavsrv eralpkltvp
241 flllqgsadr lcdskgayll melaksqdkl lkiyegayhv lhkelpevtn svfheinmwv
301 sqrtatagta spp

```

**MAGL S132A**

```

1 metgpedpss mpeessprrt pqsipyqdlp hlvnadgqyl fcrywkptgt pkalifvshg
61 agehsgryee larmlmgldl lvfahdhvgh gqsegermvv sdfhvfvrdrv lqhvdsmqkd
121 ypglpvfllg hAmggaiail taaerpghfa gmvlisplvl anpesattfk vlaakvlnlv
181 lpnlslgpid ssvlsrnkte vdiynsdpli craglkvcfg iqllnavsrv eralpkltvp
241 flllqgsadr lcdskgayll melaksqdkl lkiyegayhv lhkelpevtn svfheinmwv
301 sqrtatagta spp

```

**FAAH1**

```

1 mvqyelwaal pgasgvalac cfvaaavalr wsgrrtarga vvrarqrqra glenmdraaq
61 rfrlqnpdld seallalplp qlvqklhsre lapeavlfty vgwawevnkg tncvtsylad
121 cetqlsqapr qglllygvpvs lkecftykgq dstlglslne gvpaecdsvv vhwklqgav
181 pfvhtnvpqs mfsydcnpl fgqtvnpwks skspggssgg egaligsggs plglgtdigg
241 sirfssfcg icglkptgnr lsksglkgcv ygqeavrlsv gpmardvesl alclrallce
301 dmfrldptvp plpfreevyt ssqplrvgyy etdnytmppsp amrravletk qsleaaghtl
361 vpflpsniph aletlstggl fsdgghtflq nfkgdfvdpc lgdlvsilk1 pqwklgllaf
421 lvkpllprls aflsnmksrs agklwelqhe ievyrktvia qwraldlvvdv ltpmlapald
481 lnapgratga vsytmlyncl dfpagvvpvt tvtaedeaqm ehrygyfgdi wdkmlqkgmk
541 ksvglpvavq cvalpwqeel clrfmrever lmtpekqss

```

**FAAH1 S241A**

```

1 mvqyelwaal pgasgvalac cfvaaavalr wsgrrtarga vvrarqrqra glenmdraaq
61 rfrlqnpdld seallalplp qlvqklhsre lapeavlfty vgwawevnkg tncvtsylad
121 cetqlsqapr qglllygvpvs lkecftykgq dstlglslne gvpaecdsvv vhwklqgav
181 pfvhtnvpqs mfsydcnpl fgqtvnpwks skspggssgg egaligsggs plglgtdigg
241 Airfssfcg icglkptgnr lsksglkgcv ygqeavrlsv gpmardvesl alclrallce
301 dmfrldptvp plpfreevyt ssqplrvgyy etdnytmppsp amrravletk qsleaaghtl
361 vpflpsniph aletlstggl fsdgghtflq nfkgdfvdpc lgdlvsilk1 pqwklgllaf
421 lvkpllprls aflsnmksrs agklwelqhe ievyrktvia qwraldlvvdv ltpmlapald
481 lnapgratga vsytmlyncl dfpagvvpvt tvtaedeaqm ehrygyfgdi wdkmlqkgmk
541 ksvglpvavq cvalpwqeel clrfmrever lmtpekqss

```

**ABHD6 (NP\_001307055.1)**

```

1 mdlvvnmfv iaggtlaipi lafvasfllw psaliriyyw ywrtrlgmqv ryvhhedyyqf
61 cysfrgrpgh kpsilmlhgf sahkdmlsv vkflpknlhl vcvdmpgheg ttrsslddls
121 idgqvkrihq fveclknkk pfhlvgtsmg gqvagvyaay ypsdvsslcl vcpaglyst
181 dnqfvqrkq lqgsaaveki plipstpeem semlqlcsyv rfkvpqqilq glvdvriphn
241 nfyrklflel vsekrsylh qnmddkikvpt qiiwgkqdqv ldvsgadmla ksiancqvel
301 lencghsvvm erprktakli idflasvht dnnkkld

```

**ABHD6 S148A**

```

1 mdlvvnmfv iaggtlaipi lafvasfllw psaliriyyw ywrtrlgmqv ryvhhedyyqf
61 cysfrgrpgh kpsilmlhgf sahkdmlsv vkflpknlhl vcvdmpgheg ttrsslddls
121 idgqvkrihq fveclknkk pfhlvgtAmg gqvagvyaay ypsdvsslcl vcpaglyst

```

181 dnqfvqrlke lqgsaaveki plipstpeem semlqlcsyv rfkvpqqilq glvdvriphn  
241 nfyrrklflel vsekrsryslh qnmdkikvpt qiiwgkqdqv ldvsgadmia ksiancqvel  
301 lencghsvvm erprktakli idflasvhtnt dnnkkld

#### ABHD12 (NP\_001035937.1)

1 mrkrtepvalehercaaags sssgsaaaaal dadcrkqnl rltgpaaaep rcaadagmkr  
61 algrrrkgvwl rlrkilfcvl glyiaipfli klcpqiqakl iflnfvrvpy fidlkkpqdq  
121 glnhtcnnyl qpeedvtigv whtvpavwwk naqgkqdmwy edalasshpi ilylhgnagt  
181 rggdhrvely kvlsslgyhv vtfdyrgwgd svgtpsergm tydalhvfdw ikarsgdnpv  
241 yiwghslgtg vatnlvrrlc eretppdali lespftnire eakshpfsvi yryfpgfdwf  
301 fldpitssgi kfandenvkh iscp11lilha eddpvvpfql grklysiaap arsfdrfdkvq  
361 fvpfhsdlgy rhkyiykspe lprilreflg ksepehqh

#### ABHD12 S246A

1 mrkrtepvalehercaaags sssgsaaaaal dadcrkqnl rltgpaaaep rcaadagmkr  
61 algrrrkgvwl rlrkilfcvl glyiaipfli klcpqiqakl iflnfvrvpy fidlkkpqdq  
121 glnhtcnnyl qpeedvtigv whtvpavwwk naqgkqdmwy edalasshpi ilylhgnagt  
181 rggdhrvely kvlsslgyhv vtfdyrgwgd svgtpsergm tydalhvfdw ikarsgdnpv  
241 yiwghslgtg vatnlvrrlc eretppdali lespftnire eakshpfsvi yryfpgfdwf  
301 fldpitssgi kfandenvkh iscp11lilha eddpvvpfql grklysiaap arsfdrfdkvq  
361 fvpfhsdlgy rhkyiykspe lprilreflg ksepehqh

#### CES1 (NP\_001020365.1, isoform b)

1 mwlrafilat lsasaawghp ssppvdtvh gkvlgkfvsl egfaqpvaif lgipfakppl  
61 gplrftppqp aepwsfvkna tsyppmctqd pkagqllsel ftnrkenipl klsedclyln  
121 iytpadltkk nrlpvmvwh ggglmvgas tydg1a1ah envvvvtiqy rlg1wgf1st  
181 gdehsrgnw hldqvaalrw vqdniasfgg npgsvtifge saggesvsvl vlsplaknlf  
241 hraisegva ltsvlvkkgd vkplaeqiai tagcktttsa vmvhclrqkt ee1lettlk  
301 mkflsldlqg dpresqpll g tvidgml1lk tpeelqaern fhtvpymvgi nkqefgwlip  
361 mqlmsyplse gqldqktams llwksyplvc iakelipeat ekylggtddt vkkkdlfldl  
421 iadvmf1vps vivarnhrda gaptymyefq yrpsfssdmk pktvigdhgd elfsvfgapf  
481 lkegaseeei rlskmvmkfw anfarngn1n geglphwpey nqkegylqig antqaaqklk  
541 dke1afwtnl fakkavekpp qtehiel

#### CES1 S221A

1 mwlrafilat lsasaawghp ssppvdtvh gkvlgkfvsl egfaqpvaif lgipfakppl  
61 gplrftppqp aepwsfvkna tsyppmctqd pkagqllsel ftnrkenipl klsedclyln  
121 iytpadltkk nrlpvmvwh ggglmvgas tydg1a1ah envvvvtiqy rlg1wgf1st  
181 gdehsrgnw hldqvaalrw vqdniasfgg npgsvtifge **A**aggesvsvl vlsplaknlf  
241 hraisegva ltsvlvkkgd vkplaeqiai tagcktttsa vmvhclrqkt ee1lettlk  
301 mkflsldlqg dpresqpll g tvidgml1lk tpeelqaern fhtvpymvgi nkqefgwlip  
361 mqlmsyplse gqldqktams llwksyplvc iakelipeat ekylggtddt vkkkdlfldl  
421 iadvmf1vps vivarnhrda gaptymyefq yrpsfssdmk pktvigdhgd elfsvfgapf  
481 lkegaseeei rlskmvmkfw anfarngn1n geglphwpey nqkegylqig antqaaqklk  
541 dke1afwtnl fakkavekpp qtehiel

#### LYPLA1 (CAG33384.1)

1 mcgnnmstpl paivpaarka taaviflhgl gdtghgwaea fagirsshik yicphapvrp  
61 vtlnm1vamp swfdiig1sp dsqedesgik qaaenikali dqevkngips nriilggf1sq  
121 ggalslytal ttqqklagvt als1w1lpra sfpqgpigga nrdisilqch gdc1plvplm  
181 fgs1tveklk tlvnpanvtf ktyegmmhss cqqemmdvkq fidk1lppid

#### LYPLA1 S119A

1 mcgnnmstpl paivpaarka taaviflhgl gdtghgwaea fagirsshik yicphapvrp  
61 vtlnm1vamp swfdiig1sp dsqedesgik qaaenikali dqevkngips nriilggf**A**q



121 ggalslytal ttqqklagvt alsawlplra sfpqgpigga nrdisilqch gdcdblplm  
181 fgsltveklk tlvnpanvtf ktyegmmhss cqgemmdvkq fidkllppid

**LYPLA2 (NP\_009191.1)**

1 mcgntmsvpl ltdaatvsga eretaavifl hglgdtghsw adalstirlp hvkyicphap  
61 ripvtlnmkm vmpswfdlmg lspdapedea gikkaaenik aliehemkng ipanrivlgg  
121 fsqggalsly taltcphpla givalscwlp lhrafpqaan gsakdlailq chgeldpmvp  
181 vrfgaltaek lrsvvtparv qfktypgvmh sscpqemaav kefleklpp v

**LYPLA2 S122A**

1 mcgntmsvpl ltdaatvsga eretaavifl hglgdtghsw adalstirlp hvkyicphap  
61 ripvtlnmkm vmpswfdlmg lspdapedea gikkaaenik aliehemkng ipanrivlgg  
121 fAqggalsly taltcphpla givalscwlp lhrafpqaan gsakdlailq chgeldpmvp  
181 vrfgaltaek lrsvvtparv qfktypgvmh sscpqemaav kefleklpp v

**ABHD11**

1 mragqqlasm lrwtrawrlp reglgphgps farvpvapss ssggrggaep rplplsyrll  
61 dgeaalpavv flhglfgskt nfnsiakila qqtgrrvltv darnhgdsph spdmsyeims  
121 qdlqdlpql glvpcvvvgh smggktaml1 alqrpelver liavdispve stgvshfaty  
181 vaamrainia delprsrark ladeqlssvi qdmavrqhll tnlvevdgrf vwrnldalt  
241 qhldkilafp qrqesylgpt lfllggnsqf vhpshhpeim rlfpraqmqv vpnaqhwiha  
301 drpqdfiaai rgflv

**ABHD11 S141A**

1 mragqqlasm lrwtrawrlp reglgphgps farvpvapss ssggrggaep rplplsyrll  
61 dgeaalpavv flhglfgskt nfnsiakila qqtgrrvltv darnhgdsph spdmsyeims  
121 qdlqdlpql glvpcvvvgh Amggktaml1 alqrpelver liavdispve stgvshfaty  
181 vaamrainia delprsrark ladeqlssvi qdmavrqhll tnlvevdgrf vwrnldalt  
241 qhldkilafp qrqesylgpt lfllggnsqf vhpshhpeim rlfpraqmqv vpnaqhwiha  
301 drpqdfiaai rgflv

## Synthesis of D-luciferin methyl ester

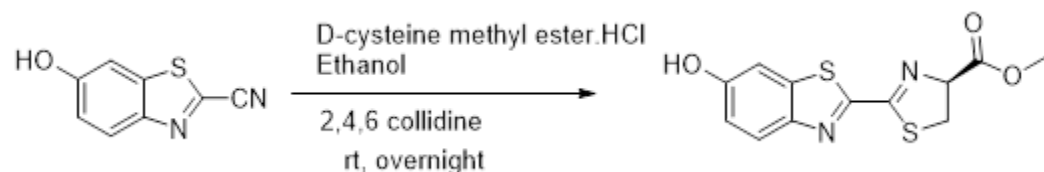

### Methyl (S)-2-(6-hydroxybenzo[d]thiazol-2-yl)-4,5-dihydrothiazole-4-carboxylate

Methyl D-cysteinate hydrochloride salt (55 mg, 0.32 mmol) and 2,4,6-collidine (50  $\mu$ L, 0.38 mmol) were dissolved in degassed ethanol (500  $\mu$ L). This solution was added to a flask containing 6-hydroxybenzothiazole-2-carbonitrile (50 mg, 0.28 mmol) dissolved in 500  $\mu$ L of degassed ethanol under argon gas. The reaction mixture was stirred at room temperature overnight. After the reaction progress was checked on TLC, ethanol was evaporated, and the crude reaction mixture was purified by flash column chromatography (0-30% acetone: hexanes). Pure fractions were combined and evaporated to yield D-luciferin methyl ester as an off-white solid (21.1 mg, 25%).  $^1\text{H}$  NMR (500 MHz,  $\text{CD}_3\text{OD}$ ):  $\delta$  7.91 (d,  $J$  = 8.9 Hz, 1H), 7.35 (d,  $J$  = 2.4 Hz, 1H), 7.08 (dd,  $J$  = 8.9, 2.4 Hz, 1H), 5.47 – 5.38 (m, 1H), 3.85 (s, 3H), 3.81 – 3.72 (m, 2H). Consistent with literature values.<sup>2</sup> Collidine has a low pKa of 7.4, so little if any racemization is expected, but we did not measure optical purity. HRMS  $[\text{M} + \text{H}]^+$  calcd for  $\text{C}_{12}\text{H}_{11}\text{N}_2\text{O}_3\text{S}_2^+$ : 295.0206 and found: 295.0205.

## References

1. Mofford, D. M. *et al.* Luciferase Activity of Insect Fatty Acyl-CoA Synthetases with Synthetic Luciferins. *ACS Chem. Biol.* **12**, 2946–2951 (2017).
2. Rothweiler, U. *et al.* Luciferin and derivatives as a DYRK selective scaffold for the design of protein kinase inhibitors. *European Journal of Medicinal Chemistry* **94**, 140–148 (2015).

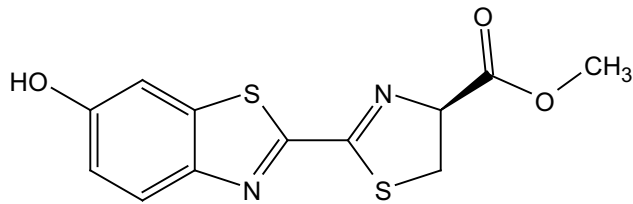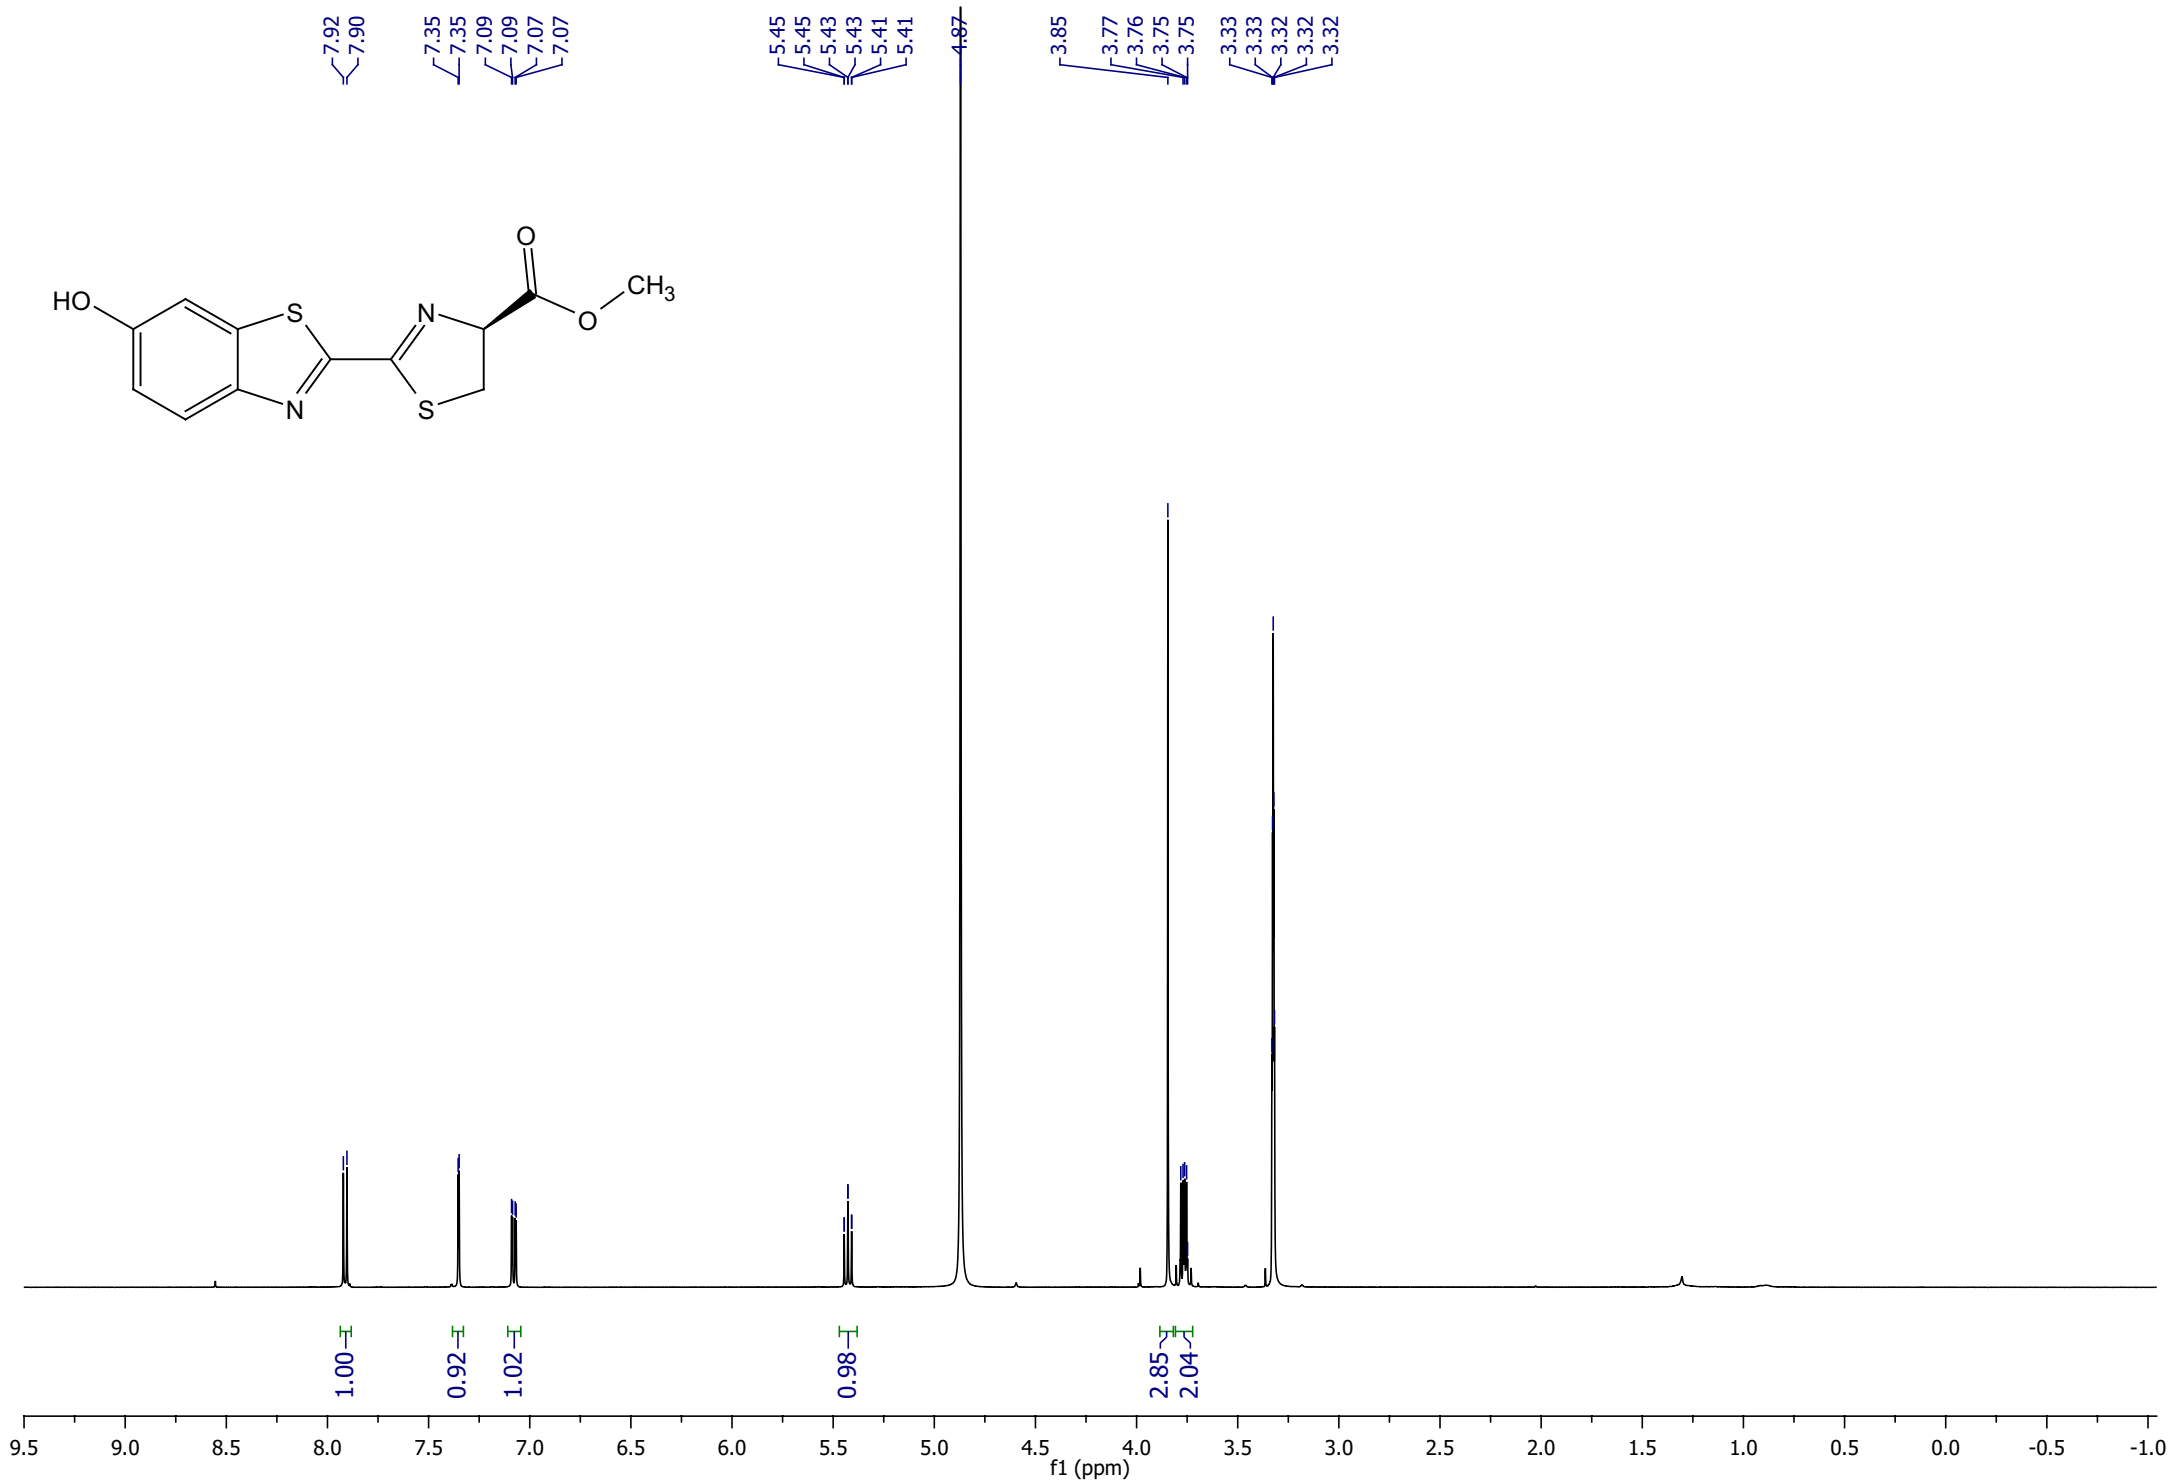

Supplement: d3cc02540c1.pdf [file d3cc02540c1.pdf]
